# Supplementary material for: Antidepressant-like Effect of Oroxylum indicum Seed Extract in Mice Model of Unpredictable Chronic Mild Stress
Source: MDPI journal article supplement (doi:10.3390/nu15224742), 2023-11-10
Supplement: s1 [file s1]

## Supplementary Materials

# Antidepressant-like effect of *Oroxylum indicum* Seed Extract in Mice Model of Unpredictable Chronic Mild Stress

Chorpeth Chalermwongkul<sup>1</sup>, Charinya Khamphukdee<sup>2</sup>, Juthamart Maneenet<sup>3</sup>, Supawadee Daodee<sup>3</sup>, Orawan Monthakantirat<sup>3</sup>, Chantana Boonyarat<sup>3</sup>, Yutthana Chotritthirong<sup>1</sup>, Suresh Awale<sup>4</sup>, Anake Kijjoa<sup>2,5</sup>, Yaowared Chulikhit<sup>3\*</sup>

<sup>1</sup> Graduated School of Pharmaceutical Sciences, Khon Kaen University, Khon Kaen, 40002, Thailand; c.chorpeth@kkumail.com, yutthana\_ch@kkumail.com

<sup>2</sup> Division of Pharmacognosy and Toxicology, Faculty of Pharmaceutical Sciences, Khon Kaen University, Khon Kaen 40002, Thailand; charkh@kku.ac.th

<sup>3</sup> Division of Pharmaceutical Chemistry, Faculty of Pharmaceutical Sciences, Khon Kaen University, Khon Kaen, 40002, Thailand; juthamart\_pp@hotmail.com, csupawad@kku.ac.th, oramon@kku.ac.th, chaboo@kku.ac.th

<sup>4</sup> Natural Drug Discovery Laboratory, Institute of Natural Medicine, University of Toyama, 2630 Sugitani, Toyama, 930-0154, Japan.; suresh@inm.u-toyama.ac.jp

<sup>5</sup> ICBAS-Instituto de Ciências Biomédicas Abel Salazar and CIIMAR, Universidade do Porto, Rua de Jorge Viterbo Ferreira 228, 4050-313 Porto, Portugal; ankijjoa@icbas.up.pt

\* Correspondence: yaosum@kku.ac.th; Tel.: +66-81-3802357

**Table S1.** The preliminarily screening of *O. indicum* parts by using HPLC analysis.

| Compounds  | Amount (mg/g extract) |               |               |
|------------|-----------------------|---------------|---------------|
|            | Seed                  | Pod           | Root          |
| Baicalin   | 84.22 ± 0.22          | 24.07 ± 0.19  | 10.82 ± 0.019 |
| Baicalein  | 23.45 ± 0.11          | 21.04 ± 0.25  | 43.60 ± 0.042 |
| Chrysin    | 11.38 ± 0.089         | 9.18 ± 0.053  | 9.73 ± 0.079  |
| Oroxylin A | ND                    | 16.07 ± 0.053 | 35.60 ± 0.12  |

Statistical Analysis of Effect of the OIS extract on UCMS-Induced Anhedonia Behavior Using Sucrose Preference Test (SPT)

**Table S2.** Paired Student's *t*-test and One-way analysis of variance (ANOVA) test of SPT

| Group comparison                             | ANOVA followed by Tukey's post hoc test |                                                          |
|----------------------------------------------|-----------------------------------------|----------------------------------------------------------|
|                                              | <i>P</i>                                | F(DF <sub>between group</sub> , DF <sub>residual</sub> ) |
| Week 0                                       |                                         |                                                          |
| non-stress group vs. UCMS + vehicle group    | 0.994                                   | t(18) = -0.00752                                         |
| All UCMS-induced groups                      | 0.980                                   | F(3,36) = 0.0619                                         |
| Week 1                                       |                                         |                                                          |
| non-stress group vs. UCMS + vehicle group    | 0.946                                   | t(18) = 0.0690                                           |
| All UCMS-induced groups                      | 0.812                                   | F(3,36) = 0.318                                          |
| Week 2                                       |                                         |                                                          |
| non-stress group vs. UCMS + vehicle group    | 0.069                                   | t(18) = 1.934                                            |
| All UCMS-induced groups                      | 0.274                                   | F(3,36) = 1.347                                          |
| Week 3                                       |                                         |                                                          |
| non-stress group vs. UCMS + vehicle group    | < 0.001                                 | t(18) = 5.016                                            |
| All UCMS-induced groups                      | 0.613                                   | F(3,36) = 0.609                                          |
| Week 4                                       |                                         |                                                          |
| non-stress group vs. UCMS + vehicle group    | < 0.001                                 | t(18) = 7.168                                            |
| All UCMS-induced groups                      | < 0.001                                 | F(3,36) = 7.192                                          |
| UMCS + vehicle group vs. UCMS + IMP20 group  | 0.005                                   |                                                          |
| UMCS + vehicle group vs. UCMS + OIS100 group | 0.233                                   |                                                          |
| UMCS + vehicle group vs. UCMS + OIS500 group | 0.001                                   |                                                          |
| UCMS + OIS100 group vs. UCMS + OIS500 group  | 0.078                                   |                                                          |
| Week 5                                       |                                         |                                                          |
| non-stress group vs. UCMS + vehicle group    | < 0.001                                 | t(18) = 9.310                                            |
| All UCMS-induced groups                      | < 0.001                                 | F(3,36) = 10.134                                         |
| UMCS + vehicle group vs. UCMS + IMP20 group  | < 0.001                                 |                                                          |
| UMCS + vehicle group vs. UCMS + OIS100 group | 0.008                                   |                                                          |
| UMCS + vehicle group vs. UCMS + OIS500 group | < 0.001                                 |                                                          |
| UCMS + OIS100 group vs. UCMS + OIS500 group  | 0.685                                   |                                                          |
| Week 6                                       |                                         |                                                          |
| non-stress group vs. UCMS + vehicle group    | < 0.001                                 | t(18) = 9.960                                            |
| All UCMS-induced groups                      | < 0.001                                 | F(3,36) = 12.664                                         |
| UMCS + vehicle group vs. UCMS + IMP20 group  | < 0.001                                 |                                                          |
| UMCS + vehicle group vs. UCMS + OIS100 group | 0.003                                   |                                                          |
| UMCS + vehicle group vs. UCMS + OIS500 group | < 0.001                                 |                                                          |
| UCMS + OIS100 group vs. UCMS + OIS500 group  | 0.351                                   |                                                          |

*Statistical Analysis of Effect of the OIS extract on UCMS-Induced Despair Behaviors Using Tail Suspension Test (TST) and Forced Swimming Test (FST)*

**Table S3.** Paired Student's *t*-test and One-way analysis of variance (ANOVA) test of TST

| Group comparison                             | ANOVA followed by Tukey's post hoc test |                                                          |
|----------------------------------------------|-----------------------------------------|----------------------------------------------------------|
|                                              | <i>P</i>                                | F(DF <sub>between group</sub> , DF <sub>residual</sub> ) |
| non-stress group vs. UCMS + vehicle group    | < 0.001                                 | t(18) = -7.452                                           |
| All UCMS-induced groups                      | < 0.001                                 | F(3,36) = 23.118                                         |
| UMCS + vehicle group vs. UCMS + IMP20 group  | < 0.001                                 |                                                          |
| UMCS + vehicle group vs. UCMS + OIS100 group | 0.035                                   |                                                          |
| UMCS + vehicle group vs. UCMS + OIS500 group | < 0.001                                 |                                                          |
| UCMS + OIS100 group vs. UCMS + OIS500 group  | 0.009                                   |                                                          |

**Table S4.** Paired Student's *t*-test and One-way analysis of variance (ANOVA) test of FST

| Group comparison                             | ANOVA followed by Tukey's post hoc test |                                                          |
|----------------------------------------------|-----------------------------------------|----------------------------------------------------------|
|                                              | <i>P</i>                                | F(DF <sub>between group</sub> , DF <sub>residual</sub> ) |
| non-stress group vs. UCMS + vehicle group    | < 0.001                                 | t(18) = -5.186                                           |
| All UCMS-induced groups                      | < 0.001                                 | F(3,36) = 13.250                                         |
| UMCS + vehicle group vs. UCMS + IMP20 group  | < 0.001                                 |                                                          |
| UMCS + vehicle group vs. UCMS + OIS100 group | 0.013                                   |                                                          |
| UMCS + vehicle group vs. UCMS + OIS500 group | < 0.001                                 |                                                          |
| UCMS + OIS100 group vs. UCMS + OIS500 group  | 0.043                                   |                                                          |

*Statistical Analysis of Effect of the OIS extract on UCMS-Induced Hypersecretion of Glucocorticoids Using Serum Corticosterone (CORT) Level*

**Table S5.** Paired Student's *t*-test and One-way analysis of variance (ANOVA) test of serum CORT level

| Group comparison                             | ANOVA followed by Tukey's post hoc test |                                                          |
|----------------------------------------------|-----------------------------------------|----------------------------------------------------------|
|                                              | <i>P</i>                                | F(DF <sub>between group</sub> , DF <sub>residual</sub> ) |
| non-stress group vs. UCMS + vehicle group    | < 0.001                                 | t(18) = -5.415                                           |
| All UCMS-induced groups                      | < 0.001                                 | F(3,16) = 18.231                                         |
| UMCS + vehicle group vs. UCMS + IMP20 group  | < 0.001                                 |                                                          |
| UMCS + vehicle group vs. UCMS + OIS100 group | < 0.001                                 |                                                          |
| UMCS + vehicle group vs. UCMS + OIS500 group | < 0.001                                 |                                                          |
| UCMS + OIS100 group vs. UCMS + OIS500 group  | 0.695                                   |                                                          |

*Statistical Analysis of Effect of the OIS extract on UCMS-Induced Hyperactivation of Hypothalamic-pituitary-adrenal (HPA) axis in Frontal Cortex and Hippocampus Using Quantitative real-time polymerase chain reaction (qPCR)*

**Table S6.** Paired Student's *t*-test and One-way analysis of variance (ANOVA) test of FK506 binding protein 51 (FKBP5) in frontal cortex and hippocampus

| Group comparison                             | ANOVA followed by Tukey's post hoc test |                                                          |
|----------------------------------------------|-----------------------------------------|----------------------------------------------------------|
|                                              | <i>P</i>                                | F(DF <sub>between group</sub> , DF <sub>residual</sub> ) |
| Frontal cortex                               |                                         |                                                          |
| non-stress group vs. UCMS + vehicle group    | < 0.001                                 | t(10) = -9.425                                           |
| All UCMS-induced groups                      | < 0.001                                 | F(3,20) = 23.573                                         |
| UMCS + vehicle group vs. UCMS + IMP20 group  | < 0.001                                 |                                                          |
| UMCS + vehicle group vs. UCMS + OIS100 group | 0.002                                   |                                                          |
| UMCS + vehicle group vs. UCMS + OIS500 group | < 0.001                                 |                                                          |
| UCMS + OIS100 group vs. UCMS + OIS500 group  | 0.009                                   |                                                          |
| Hippocampus                                  |                                         |                                                          |
| non-stress group vs. UCMS + vehicle group    | < 0.001                                 | t(10) = -5.868                                           |
| All UCMS-induced groups                      | < 0.001                                 | F(3,20) = 21.625                                         |
| UMCS + vehicle group vs. UCMS + IMP20 group  | < 0.001                                 |                                                          |
| UMCS + vehicle group vs. UCMS + OIS100 group | 0.006                                   |                                                          |
| UMCS + vehicle group vs. UCMS + OIS500 group | < 0.001                                 |                                                          |
| UCMS + OIS100 group vs. UCMS + OIS500 group  | 0.009                                   |                                                          |

**Table S7.** Paired Student's *t*-test and One-way analysis of variance (ANOVA) test of serine/threonine-protein kinase 1 (SGK-1) in frontal cortex and hippocampus

| Group comparison                             | ANOVA followed by Tukey's post hoc test |                                                          |
|----------------------------------------------|-----------------------------------------|----------------------------------------------------------|
|                                              | <i>P</i>                                | F(DF <sub>between group</sub> , DF <sub>residual</sub> ) |
| Frontal cortex                               |                                         |                                                          |
| non-stress group vs. UCMS + vehicle group    | < 0.001                                 | t(10) = -17.690                                          |
| All UCMS-induced groups                      | < 0.001                                 | F(3,20) = 93.881                                         |
| UMCS + vehicle group vs. UCMS + IMP20 group  | < 0.001                                 |                                                          |
| UMCS + vehicle group vs. UCMS + OIS100 group | < 0.001                                 |                                                          |
| UMCS + vehicle group vs. UCMS + OIS500 group | < 0.001                                 |                                                          |
| UCMS + OIS100 group vs. UCMS + OIS500 group  | <0.001                                  |                                                          |
| Hippocampus                                  |                                         |                                                          |
| non-stress group vs. UCMS + vehicle group    | < 0.001                                 | t(10) = -2.353                                           |
| All UCMS-induced groups                      | < 0.001                                 | F(3,20) = 21.625                                         |
| UMCS + vehicle group vs. UCMS + IMP20 group  | < 0.001                                 |                                                          |
| UMCS + vehicle group vs. UCMS + OIS100 group | 0.003                                   |                                                          |
| UMCS + vehicle group vs. UCMS + OIS500 group | < 0.001                                 |                                                          |
| UCMS + OIS100 group vs. UCMS + OIS500 group  | 0.029                                   |                                                          |

**Table S8.** Paired Student's *t*-test and One-way analysis of variance (ANOVA) test of glucocorticoid receptor (GR) in frontal cortex and hippocampus

| Group comparison                             | ANOVA followed by Tukey's post hoc test |                                                          |
|----------------------------------------------|-----------------------------------------|----------------------------------------------------------|
|                                              | <i>P</i>                                | F(DF <sub>between group</sub> , DF <sub>residual</sub> ) |
| Frontal cortex                               |                                         |                                                          |
| non-stress group vs. UCMS + vehicle group    | < 0.001                                 | t(10) = 11.873                                           |
| All UCMS-induced groups                      | < 0.001                                 | F(3,20) = 27.307                                         |
| UMCS + vehicle group vs. UCMS + IMP20 group  | < 0.001                                 |                                                          |
| UMCS + vehicle group vs. UCMS + OIS100 group | 0.007                                   |                                                          |
| UMCS + vehicle group vs. UCMS + OIS500 group | < 0.001                                 |                                                          |
| UCMS + OIS100 group vs. UCMS + OIS500 group  | 0.001                                   |                                                          |
| Hippocampus                                  |                                         |                                                          |
| non-stress group vs. UCMS + vehicle group    | < 0.001                                 | t(10) = 10.531                                           |
| All UCMS-induced groups                      | < 0.001                                 | F(3,20) = 8.894                                          |
| UMCS + vehicle group vs. UCMS + IMP20 group  | 0.005                                   |                                                          |
| UMCS + vehicle group vs. UCMS + OIS100 group | 0.363                                   |                                                          |
| UMCS + vehicle group vs. UCMS + OIS500 group | < 0.001                                 |                                                          |
| UCMS + OIS100 group vs. UCMS + OIS500 group  | 0.034                                   |                                                          |

*Statistical Analysis of Effect of the OIS extract on UCMS-Induced Impaired Neurogenesis in Frontal Cortex and Hippocampus Using Quantitative real-time polymerase chain reaction (qPCR)*

**Table S9.** Paired Student's *t*-test and One-way analysis of variance (ANOVA) test of brain-derived neurotrophic factor (BDNF) in frontal cortex and hippocampus

| Group comparison                             | ANOVA followed by Tukey's post hoc test |                                                          |
|----------------------------------------------|-----------------------------------------|----------------------------------------------------------|
|                                              | <i>P</i>                                | F(DF <sub>between group</sub> , DF <sub>residual</sub> ) |
| Frontal cortex                               |                                         |                                                          |
| non-stress group vs. UCMS + vehicle group    | < 0.001                                 | t(10) = 9.911                                            |
| All UCMS-induced groups                      | < 0.001                                 | F(3,20) = 27.347                                         |
| UMCS + vehicle group vs. UCMS + IMP20 group  | < 0.001                                 |                                                          |
| UMCS + vehicle group vs. UCMS + OIS100 group | 0.100                                   |                                                          |
| UMCS + vehicle group vs. UCMS + OIS500 group | < 0.001                                 |                                                          |
| UCMS + OIS100 group vs. UCMS + OIS500 group  | < 0.001                                 |                                                          |
| Hippocampus                                  |                                         |                                                          |
| non-stress group vs. UCMS + vehicle group    | < 0.001                                 | t(10) = 9.214                                            |
| All UCMS-induced groups                      | < 0.001                                 | F(3,20) = 10.661                                         |
| UMCS + vehicle group vs. UCMS + IMP20 group  | 0.007                                   |                                                          |
| UMCS + vehicle group vs. UCMS + OIS100 group | 0.750                                   |                                                          |
| UMCS + vehicle group vs. UCMS + OIS500 group | < 0.001                                 |                                                          |
| UCMS + OIS100 group vs. UCMS + OIS500 group  | 0.004                                   |                                                          |

**Table S10.** Paired Student's *t*-test and One-way analysis of variance (ANOVA) test of cyclic AMP-responsive element-binding protein (CREB) in frontal cortex and hippocampus

| Group comparison                             | ANOVA followed by Tukey's post hoc test |                                                          |
|----------------------------------------------|-----------------------------------------|----------------------------------------------------------|
|                                              | <i>P</i>                                | F(DF <sub>between group</sub> , DF <sub>residual</sub> ) |
| Frontal cortex                               |                                         |                                                          |
| non-stress group vs. UCMS + vehicle group    | < 0.001                                 | t(10) = 8.993                                            |
| All UCMS-induced groups                      | < 0.001                                 | F(3,20) = 13.720                                         |
| UMCS + vehicle group vs. UCMS + IMP20 group  | 0.005                                   |                                                          |
| UMCS + vehicle group vs. UCMS + OIS100 group | 0.814                                   |                                                          |
| UMCS + vehicle group vs. UCMS + OIS500 group | < 0.001                                 |                                                          |
| UCMS + OIS100 group vs. UCMS + OIS500 group  | < 0.001                                 |                                                          |
| Hippocampus                                  |                                         |                                                          |
| non-stress group vs. UCMS + vehicle group    | < 0.001                                 | t(10) = 4.649                                            |
| All UCMS-induced groups                      | < 0.001                                 | F(3,20) = 7.058                                          |
| UMCS + vehicle group vs. UCMS + IMP20 group  | 0.031                                   |                                                          |
| UMCS + vehicle group vs. UCMS + OIS100 group | 0.911                                   |                                                          |
| UMCS + vehicle group vs. UCMS + OIS500 group | 0.004                                   |                                                          |
| UCMS + OIS100 group vs. UCMS + OIS500 group  | 0.018                                   |                                                          |

**Table S11.** Validation result of the HPLC method for determination of baicalin, baicalein, chrysin, and oroxylin A

| Parameter               |                                             | Baicalin             | Baicalein            | Chrysin              | Oroxylin A           |
|-------------------------|---------------------------------------------|----------------------|----------------------|----------------------|----------------------|
| LOQ                     | Concentration (µg/ml)                       | 1.0                  | 2.5                  | 1                    | 2.5                  |
|                         | S/N                                         | 9.83 ± 0.20          | 9.90 ± 0.19          | 9.84 ± 0.10          | 9.91 ± 0.13          |
| Linearity               | Range (µg/ml)                               | 1 – 6                | 2.5 – 15             | 2.5 – 15             | 2.5 – 15             |
|                         | Equation                                    | y = 54.636x - 21.493 | y = 51.014x - 54.144 | y = 88.454x - 45.318 | y = 72.566x - 76.601 |
|                         | Coefficient determination (R <sup>2</sup> ) | 0.9997               | 0.9996               | 0.9991               | 0.9997               |
| Precision               | Repeatability                               |                      |                      |                      |                      |
|                         | (within day)                                | 0.26 – 0.92%         | 0.1 – 1.59%          | 0.28 – 0.89%         | 0.08 – 0.80%         |
|                         | RSD                                         |                      |                      |                      |                      |
|                         | Intermediate precision                      |                      |                      |                      |                      |
| Accuracy<br>(%recovery) | (between day)                               | 0.30 – 3.77%         | 0.20 – 1.32%         | 0.08 – 0.95%         | 0.14 – 1.43%         |
|                         | RSD                                         |                      |                      |                      |                      |
|                         | Low concentration                           | 104.8 ± 1.43         | 101.66 ± 0.86        | 104.99 ± 0.71        | 101.40 ± 0.65        |
|                         | Medium concentration                        | 99.39 ± 0.12         | 99.95 ± 0.52         | 100.87 ± 0.094       | 100.66 ± 0.23        |
|                         | High concentration                          | 100.13 ± 0.15        | 99.92 ± 0.15         | 99.41 ± 0.085        | 99.48 ± 0.14         |

**(A) Inhibitory effect of *O. indicum* seed on MAO-A enzyme**

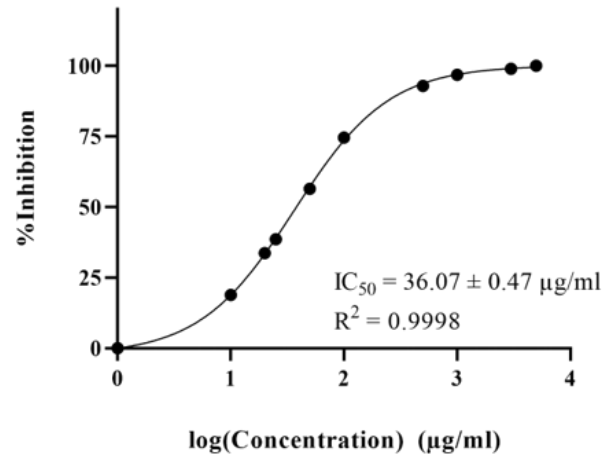

**(B) Inhibitory effect of *O. indicum* seed on MAO-B enzyme**

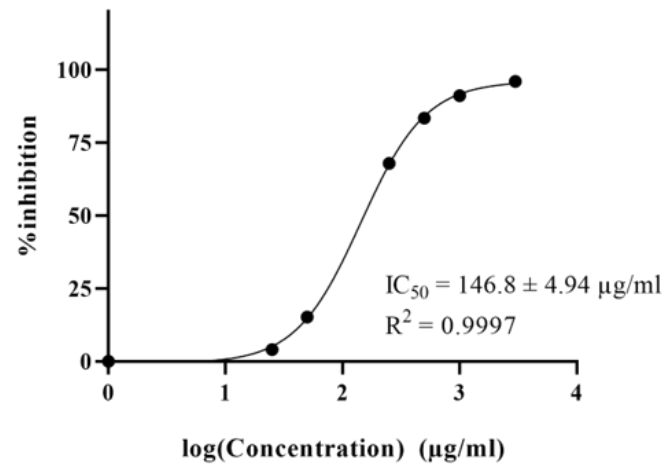

**Figure S1.** Inhibitory effect of *O. indicum* seed on MAO-A and MAO-B (panel A and B, respectively). The inhibition graph was plot between log(concentration) (X-axis) and %inhibition (Y-axis).



**(A) Inhibitory effect of Clorgyline on MAO-A enzyme**

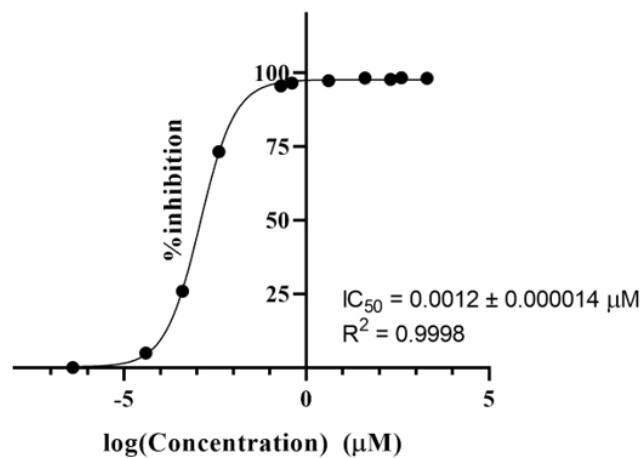

**(B) Inhibitory effect of Clorgyline on MAO-B enzyme**

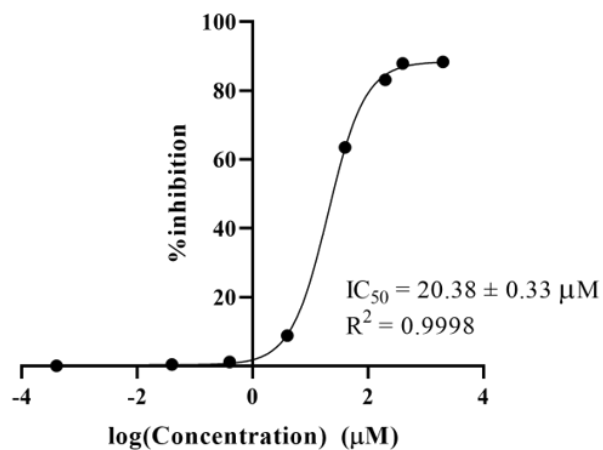

**Figure S2.** Inhibitory effect of Clorgyline on MAO-A and MAO-B (panel A and B, respectively). The inhibition graph was plot between  $\log(\text{concentration})$  (X-axis) and  $\% \text{inhibition}$  (Y-axis)

**(A) Inhibitory effect of Deprenyl on MAO-A enzyme**

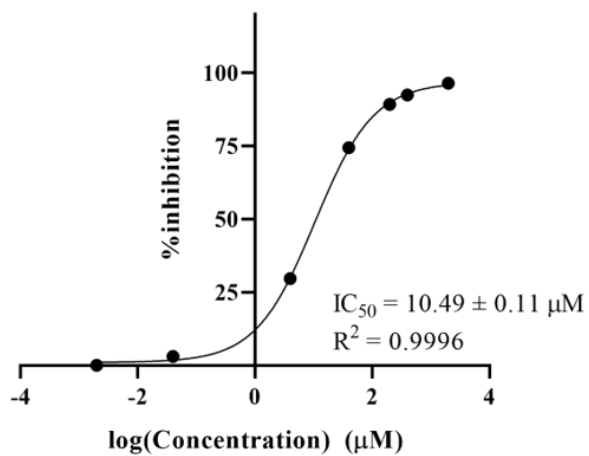

**(B) Inhibitory effect of Deprenyl on MAO-B enzyme**

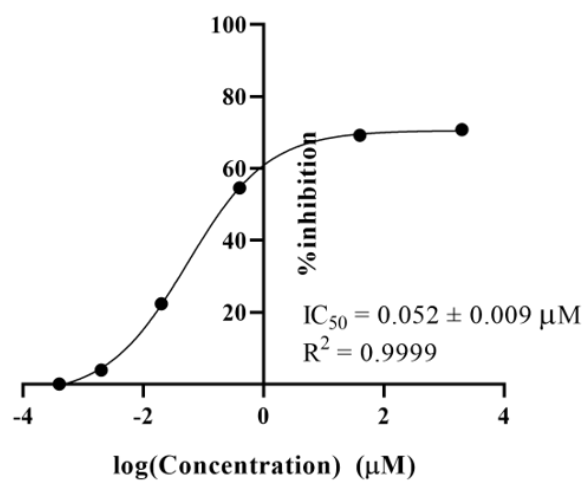

**Figure S3.** Inhibitory effect of Deprenyl on MAO-A and MAO-B (panel A and B, respectively). The inhibition graph was plot between log(concentration) (X-axis) and %inhibition (Y-axis)
